# Supplementary material
Source: PubMed Central journal article supplement (PMC5098273)
Supplement: NIHMS817433-supplement-Supp_Figs_and_Tables.pdf [file NIHMS817433-supplement-Supp_Figs_and_Tables.pdf]

## Supplementary Information

### Covalent targeting of remote cysteine residues to develop CDK12 and 13 inhibitors

**Authors:** Tinghu Zhang<sup>1,2,10</sup>, Nicholas Kwiatkowski<sup>1,2,3,10</sup>, Calla M Olson<sup>1,2,10</sup>, Sarah E Dixon-Clarke<sup>5</sup>, Brian J Abraham<sup>3</sup>, Ann K Greifenberg<sup>6</sup>, Scott B Ficarro<sup>1,2,7</sup>, Jonathan M Elkins<sup>5</sup>, Yanke Liang<sup>1,2</sup>, Nancy M Hannett<sup>3</sup>, Theresa Manz<sup>1,8</sup>, Mingfeng Hao<sup>1,2</sup>, Bartłomiej Bartkowiak<sup>9</sup>, Arno L Greenleaf<sup>9</sup>, Jarrod A Marto<sup>1,2,7</sup>, Matthias Geyer<sup>6</sup>, Alex N Bullock<sup>5</sup>, Richard A Young<sup>3,4\*</sup>, Nathanael S Gray<sup>1,2\*</sup>

**Affiliations:** <sup>1</sup>Department of Cancer Biology, Dana-Farber Cancer Institute, Boston, MA 02115, USA. <sup>2</sup>Department of Biological Chemistry and Molecular Pharmacology, Harvard Medical School, Boston, MA 02115, USA. <sup>3</sup>Whitehead Institute for Biomedical Research, 9 Cambridge Center, Cambridge, MA 02142, USA. <sup>4</sup>Department of Biology, Massachusetts Institute of Technology, Cambridge, MA 02139, USA. <sup>5</sup>Structural Genomics Consortium, University of Oxford, Old Road Campus, Oxford OX3 7DQ, UK. <sup>6</sup>Department of Structural Immunology, Institute of Innate Immunity, University of Bonn, 53127 Bonn, and Center of Advanced European Studies and Research, 53175 Bonn, Germany. <sup>7</sup>Blais Proteomics Center, Dana-Farber Cancer Institute, Boston, MA 02115, USA. <sup>8</sup>Pharmaceutical and Medicinal Chemistry, Department of Pharmacy, Saarland University, 66123 Saarbrücken, Germany. <sup>9</sup>Department of Biochemistry, Duke University Medical Center, Durham, NC 27710, USA. <sup>10</sup>These authors contributed equally to this work.

\*To whom correspondence may be addressed: Dept. of Biological Chemistry and Molecular Pharmacology, Harvard Medical School, 250 Longwood Ave., Boston, MA 02115. Tel.: 617-582-8590; Fax: 617-582-8615; E-mail: Nathanael\_Gray@dfci.harvard.edu or Whitehead Institute for Biomedical Research, 9 Cambridge Center, Cambridge, MA 02142. Tel.: 617-258-5218; E-mail: young@wi.mit.edu.

## Supplementary Results

### Supplementary Figures

**Supplementary Figure 1 | THZ531 targets CDK12 and 13 by covalent modification of distal C-terminal cysteine residues.** **a.** Schematic of target engagement experiment. Jurkat cells were treated with increasing doses of THZ531 or DMSO for 6 hrs (Step 1). Cellular lysates were made from cells from each DMSO or THZ531 concentration point (Step 2). Clarified lysates from each treatment condition were then incubated with either 1 $\mu$ M bioTHZ1 (Step 3a), a concentration that binds CDK7-cyclin H, CDK12-cyclin K, and CDK13-cyclin K complexes or 1  $\mu$ M bioAT7519 (Step 3b) a concentration known to bind CDK9. Subsequent addition of streptavidin -coated beads permits the immunoprecipitation of the indicated protein complexes. Following washing of beads with lysis buffer, the immunoprecipitated proteins were eluted from the beads by boiling in SDS buffer. Western blotting of precipitated proteins for CDK12, CDK13, or cyclin K was used to identify precipitated CDK12-cyclin K or CDK13-cyclin K complexes (Step 4a). Western blotting of precipitated proteins for CDK7 or cyclin H was used to identify precipitated CDK7-cyclin H complexes (Step 4a). And finally, CDK9 western blotting was used to identify precipitated CDK9 complexes (Step 4b). As THZ531 binds to its intended targets covalently, pretreatment of cells with THZ531 parent compound would be expected to block subsequent capture and immunoprecipitation of CDK12, 13, and 7 complexes with bioTHZ1 (or CDK9 with bioAT7519). Therefore, treating cells with THZ531 in dose titration permits us to ascertain at what concentration THZ531 is binding to each of these kinase complexes in cells, giving us a readout of intracellular selectivity. Uncut western blots are in Supplementary Fig. 10. **b.** THZ531 does not bind intracellular CDK9 complexes. THZ531 does not compete with lysate – introduced bioAT7519 for binding to CDK9. **c.** Mass spectra (top, middle bottom) and zero-charge mass spectra (middle top, bottom) of CDK12- cyclin K complex that were treated with DMSO (top, middle top) or THZ531 (middle bottom, bottom) for 1 hr at room temperature. After covalent bond formation, the masses of CDK12 (3) and phosphorylated CDK12 (2) increase by ~558 Da (THZ531). Although cyclin K (1) contains 7 cysteine residues it does not exhibit a mass shift indicating THZ531 does not form a covalent bond with this protein. **d.** Mass spectrum (top) and MS/MS spectrum (bottom) recorded during nanoLC-MS analysis of glu-c digested CDK12-cyclin K complex after treatment with THZ531 for 1 hr at room temperature illustrate detection of precursor (top) and product (bottom) ions of the peptide LSK(M\*)APPDLPHQD(C\*)HE (CDK12 residues 1026-1041). Ions y2 and y3 indicate C1039 forms a covalent bond with THZ531. Blue and red dots next to the sequence highlight detected ions of type b and y, respectively. (C\*), THZ531 labeled cysteine; (M\*), oxidized methionine. **e.** Structures of THZ531R and THZ532.

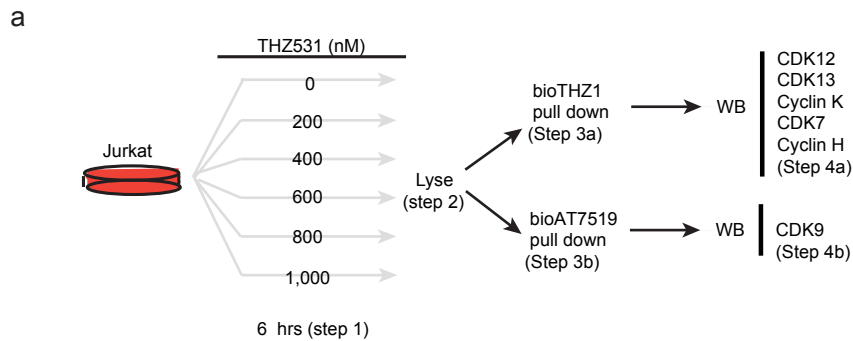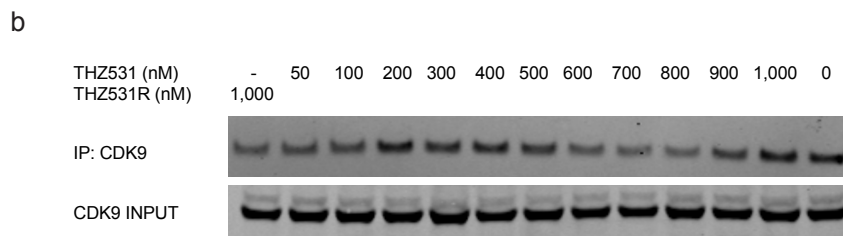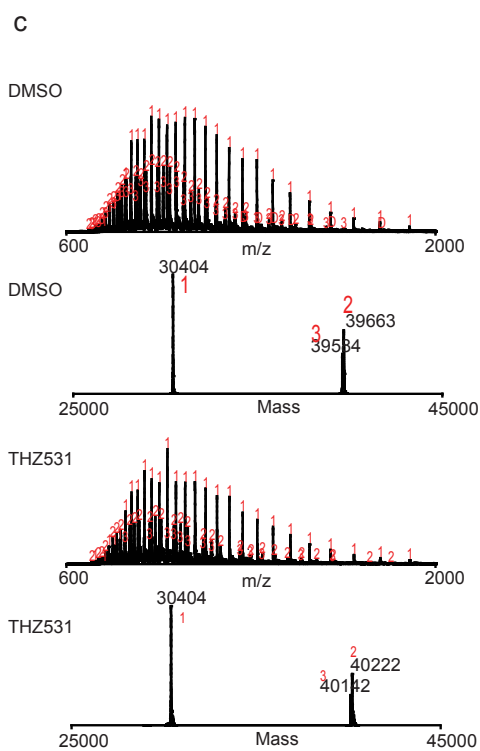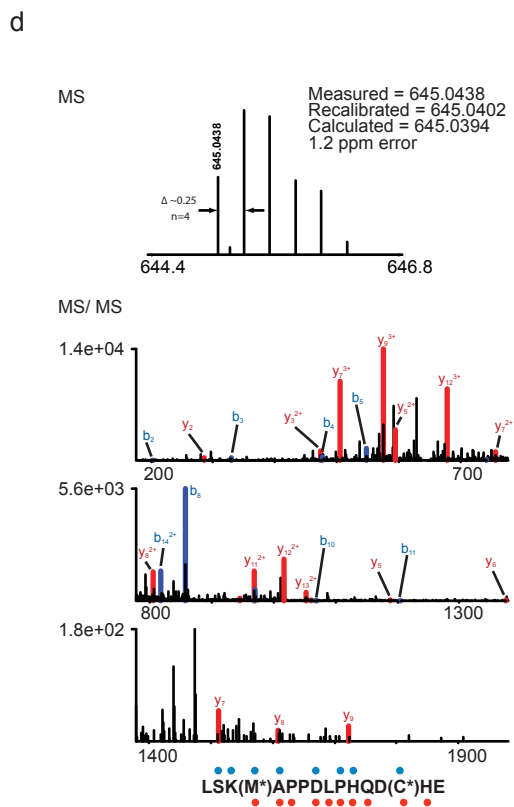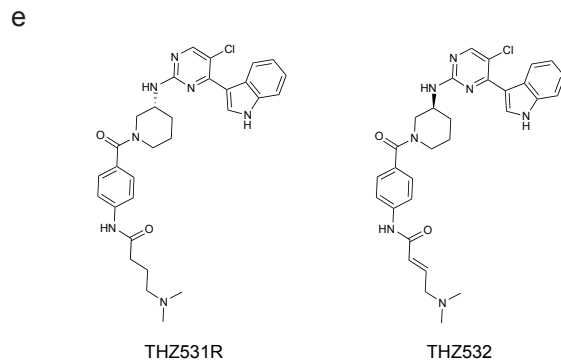

**Supplementary Figure 2 | Time series of transcription kinase inhibition at different pre-incubation times and varying inhibitor concentrations.** **a**, Kinase inhibition assay using THZ531R, the reversible analog of THZ531, resulted in similarly high  $IC_{50}$  values against CDK12, CDK13, CDK9, and CDK7. Measurements were made in triplicate and data represent the mean  $\pm$  S.D. **b**, Kinase inhibition assays using THZ532, the inactive enantiomer of THZ531, produced similarly high  $IC_{50}$  values against CDK12, CDK13, CDK9, and CDK7. Measurements were made in triplicate and data represent the mean values  $\pm$  S.D. **c**, THZ531 exhibits reduced activity against CDK7. Measurements were made in triplicate and data represent the mean values  $\pm$  S.D. **d**, THZ531 and THZ531R do not inhibit Erk1. *In vitro* kinase activity assays using recombinant protein were applied to analyze the effect of the THZ531 compound on a member of the MAP kinase family. Measurements were made in triplicate and data represent the mean values  $\pm$  S.D. **e**, Assay schematic: To a concentration of 0.2  $\mu$ M CDK- cyclin complex different concentrations of THZ531 were added, ranging from 0.001  $\mu$ M to 100  $\mu$ M. Pre-incubation times of 1 min to 9 hrs were followed before the kinase reaction was started by addition radioactively labeled ATP and substrate peptide. A kinase reaction time course of 30 min was applied before the reaction was stopped and the kinase activity measured. The incubation time and the kinase activity time course were performed at 30°C at 350 r.p.m. Measurements were made in triplicate and data represent the mean values  $\pm$  S.D. **f**, *In vitro* kinase activity assay of 0.2  $\mu$ M CDK9- cyclin T1 after different preincubation times with varying concentrations of THZ531. Increasing concentrations of THZ531 do not result in significantly reduced kinase activity at longer pre-incubation times, supporting that the CDK9–THZ531 interaction is reversible. As control, the decrease of kinase activity in the absence of THZ531 was measured to monitor the loss of enzymatic activity over time. The counts per minute of the kinase activity measurements were normalized to the relative [ $^{32}$ P] transfer. Measurements were made in triplicate and data represent the mean values  $\pm$  S.D. **g**, THZ531 has lower affinity for PLK1, Aurora A and Aurora B, compared to CDK12/13. *In vitro* kinase assays were performed by Life Technologies in duplicate at an ATP concentration =  $K_m$  for each kinase. Data represent the mean of values  $\pm$  S.D.

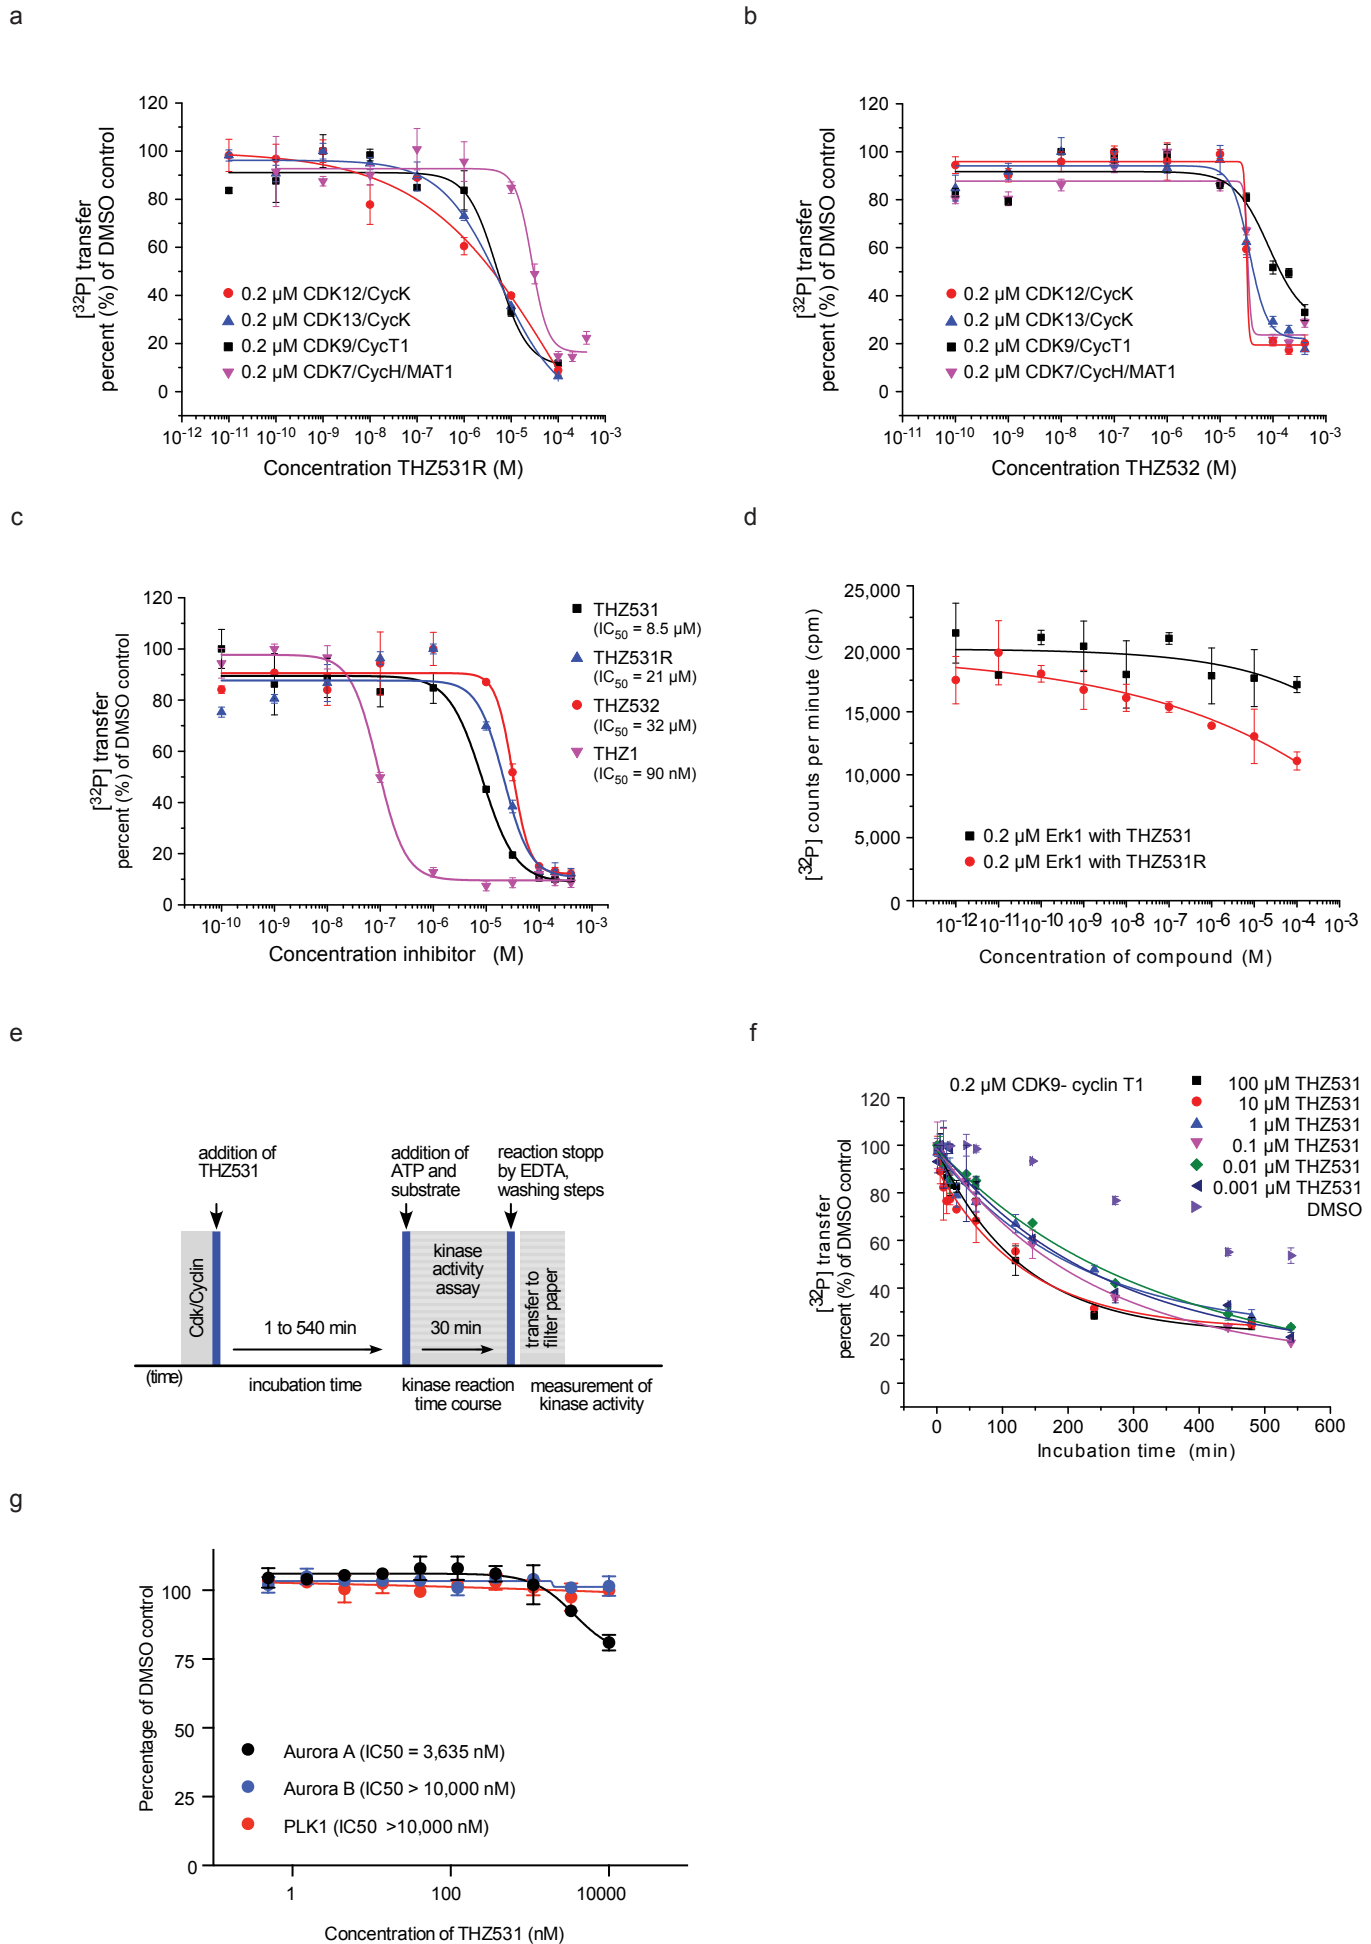

**Supplementary Figure 3 | Electron density for THZ531 and the PITAIRES helix of CDK12.**  
Stereo view showing electron density (2Fo-Fc contoured at 1.0 $\sigma$ ) of the CDK12 PITAIRES helix ( $\alpha$ C).

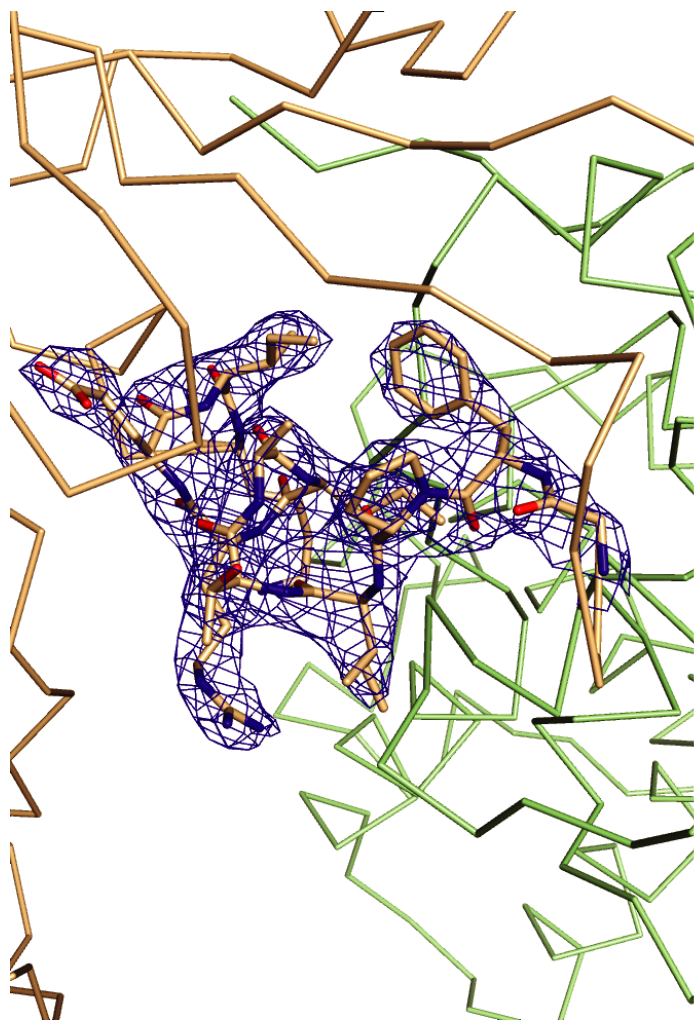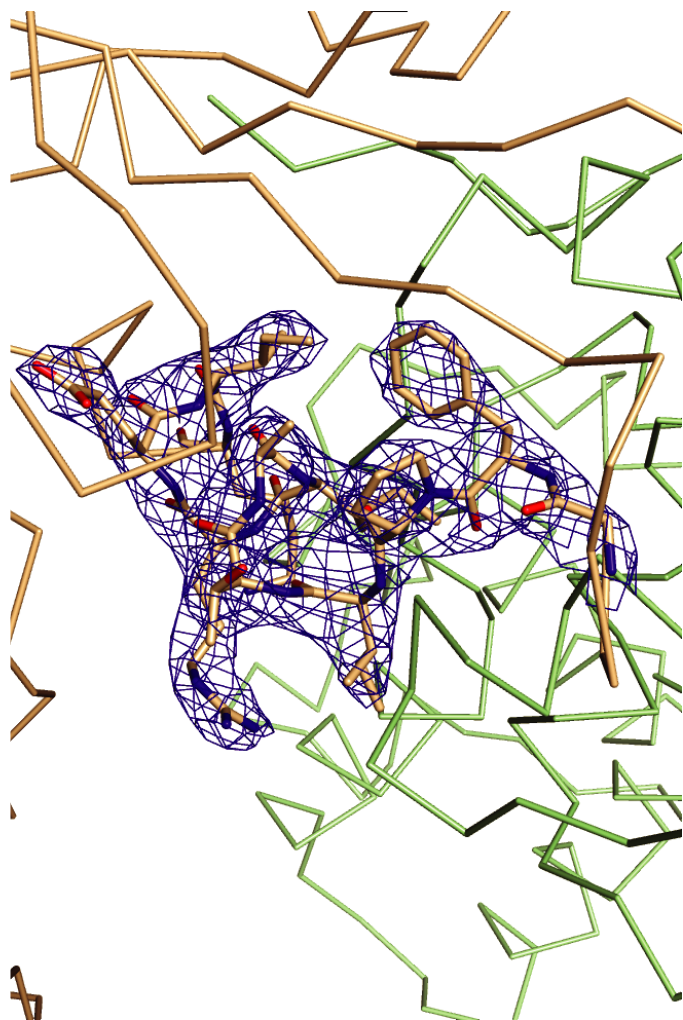

**Supplementary Figure 4 | THZ531 induces apoptosis to Jurkat cells**

**a.** Representative Annexin V and propidium iodide stainings for Jurkat cells incubated with THZ531. Jurkat cells were treated with 50, 200, 350, and 500 nM THZ531 for the indicated times. Cells were stained with Annexin V and propidium iodide. Experiments were performed in biological triplicate. **b.** THZ531 induces PARP cleavage. Jurkat cells were treated with 50, 200, 350, and 500 nM THZ531 for 24 hours. Lysates were probed with PARP and tubulin antibodies. Uncut western blots are in Supplementary Fig. 10.



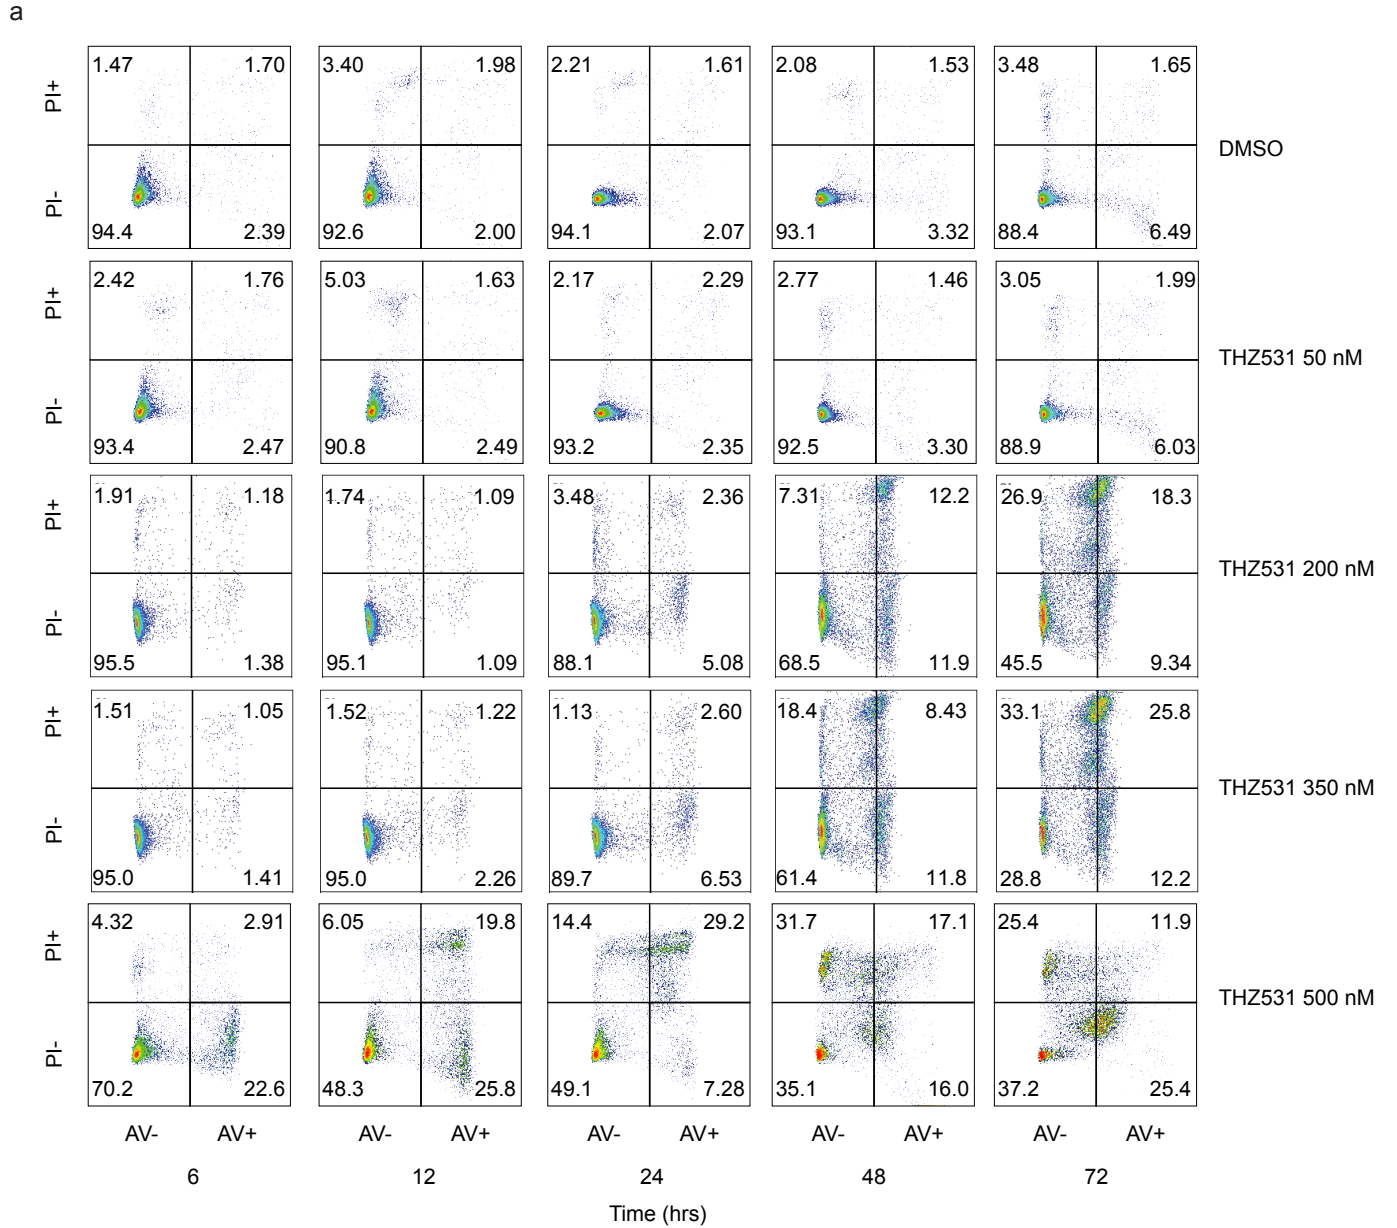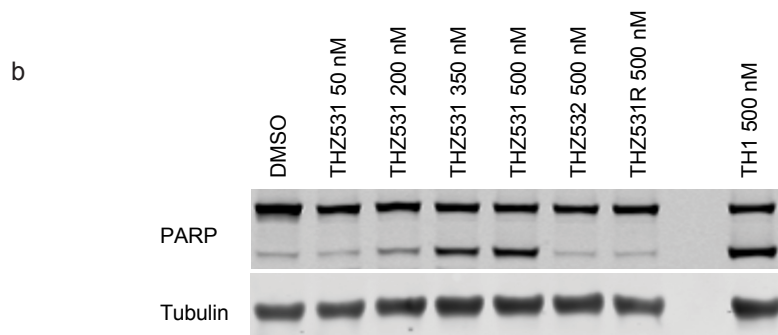

**Supplementary Figure 5 | Mutation of Cys-1039 to serine reduces CDK12 covalent affinity and rescues THZ531 –induced proliferation defects. a,** Gene track of CDK12 with schematic of CRISPR technique to mutate CDK12 allele. **b,** CRISPR technique mutates C1039 to serine (C1039S). Genomic DNA from CDK12 WT control and CDK12 C1039S HAP1 cells were Sanger sequenced. TGC (Cys) was successfully mutated to TCC (Ser). Other silent mutations were added to remove NGG CRISPR targeting sequence and to permit initial PCR screening of mutated alleles. **c,** CDK12 C1039S mutation prevents CDK12 pulldown with bioTHZ1. 25 million cells of WT control and C1039S HAP1 clones were lysed and probed with 1  $\mu$ M bioTHZ1 at 4 degrees overnight. Interacting proteins were precipitated with streptavidin beads and probed with indicated antibodies. Uncut westerns blots are in Supplementary Fig. 10.

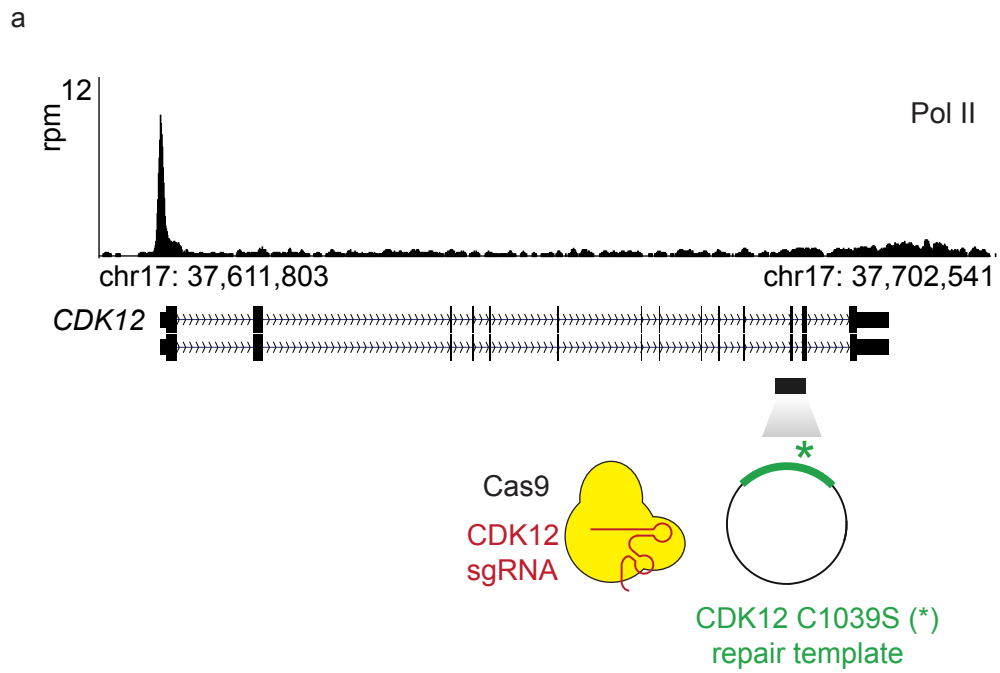

**b**

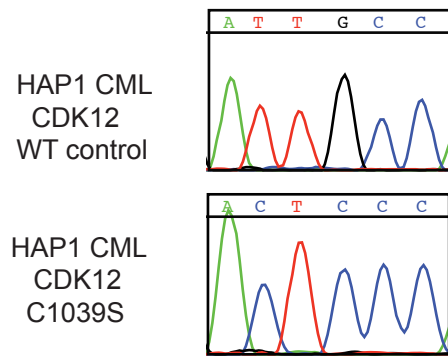

**c**

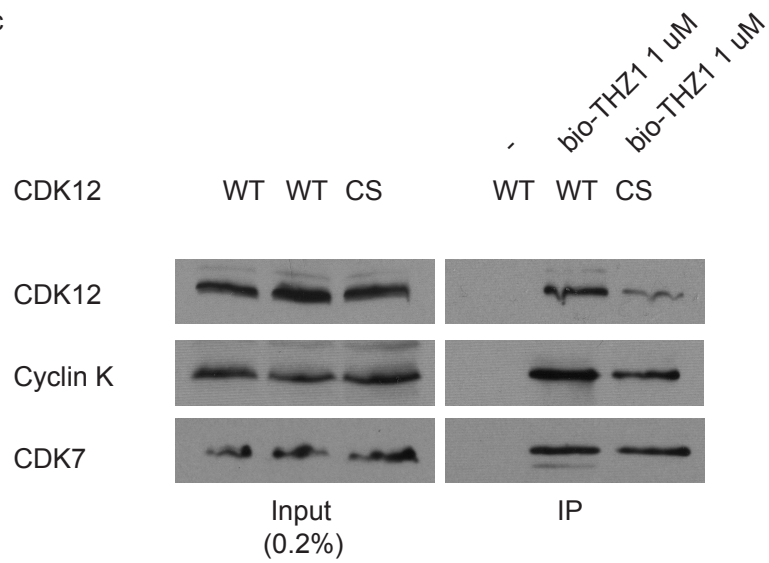

**Supplementary Figure 6 | THZ531 inhibits gene expression** **a**, Expression of CDK12 C1039S partially restores T-ALL transcription factor gene expression. RT qPCR of T-ALL transcription factors and DDR gene transcripts. RT qPCRs were performed in biological triplicate and error bars are +/- SD. **b**, THZ531R and THZ532 do not affect steady-state mRNA levels. Jurkat cells were treated with 500 nM THZ531, THZ531R, or THZ532 for 6 hrs. Heatmaps display the log<sub>2</sub> fold-change in gene expression vs. DMSO for the 14,745 transcripts expressed in DMSO. **c**, THZ1 and THZ531 display similar yet distinct effects on the expression of 14,745 expressed genes (in DMSO). Log<sub>2</sub> fold-change in gene expression for 50 nM THZ1 vs. THZ531 (left) and 250 nM THZ1 vs. 500 nM THZ531 (right). Pearson coefficient  $r = 0.60$  and  $0.84$  respectively.

**a**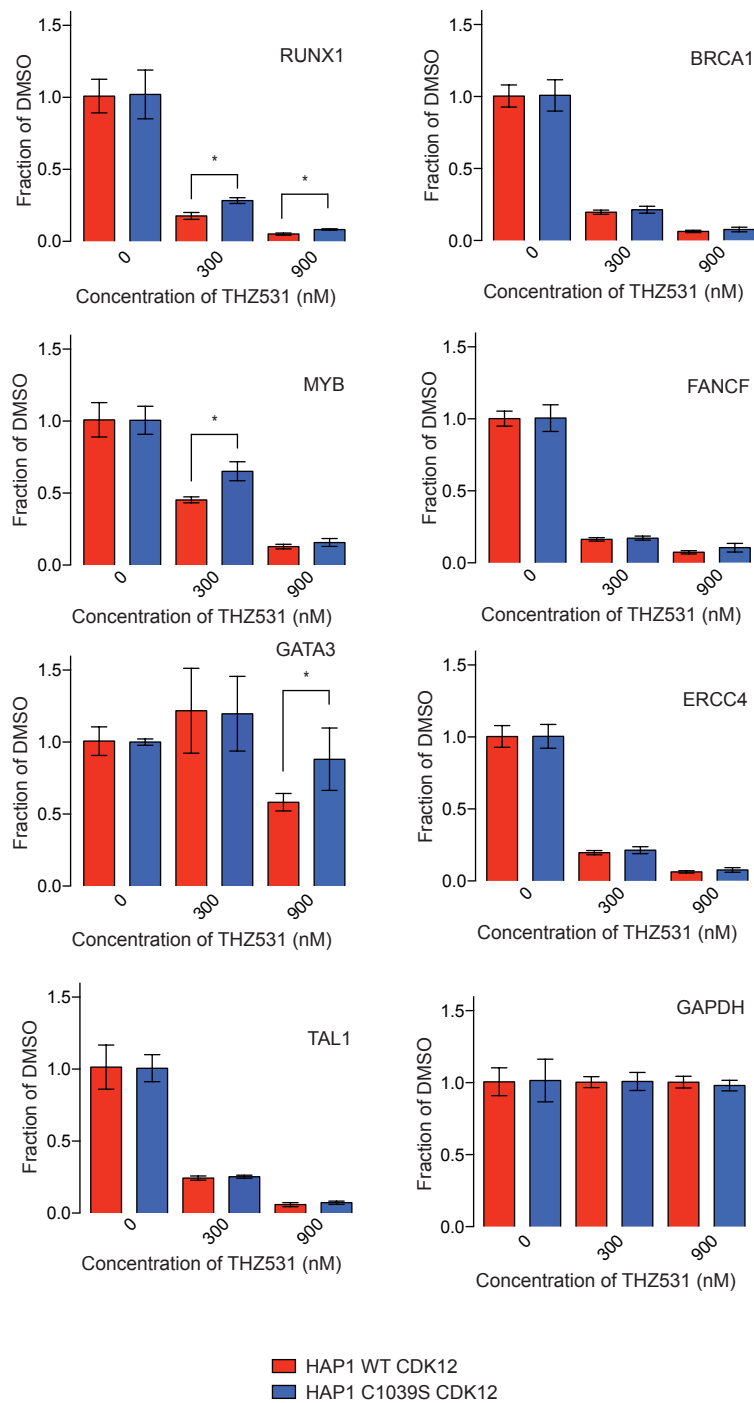**b**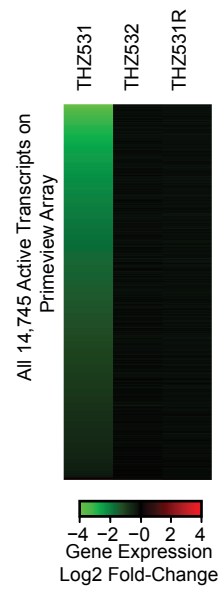**c**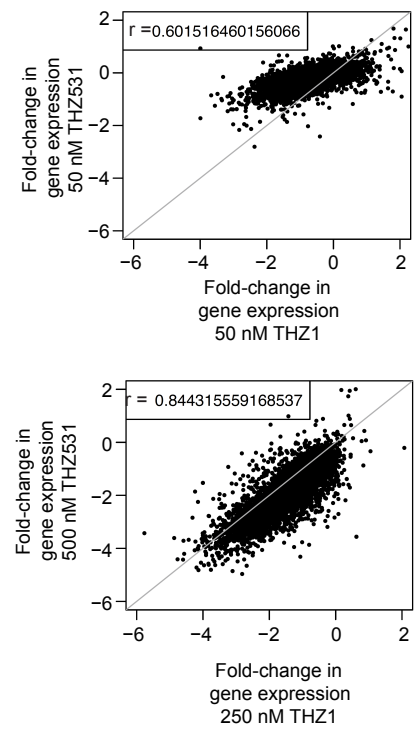

**Supplementary Figure 7 | THZ531 inhibits transcriptional elongation.** **a**, Gene tracks whose expression is sensitive to THZ531. **b**, THZ531 and Flavopiridol show different effects on Pol II distributions. Metagene representation of global Pol II occupancy across gene bodies. Average ChIP-seq signal in 13906 genes expressed in 6h DMSO conditions in units of rpm/bp (left). Gene tracks of Pol II ChIP-seq at *RUNX1* gene locus following 250 nM Flavopiridol treatment for 6 hrs. (right). **c**, Flavopiridol significantly increases promoter-bound Pol II ChIP-seq signal and decreases elongating Pol II ChIP-seq signal at Flavopiridol-responsive genes relative to non-responsive genes. Box plots of Pol II ChIP-seq signal density at 5' transcriptional start sites (TSS) and 3' termination sites (TSS) at 2001 Flavopiridol-responsive genes (Resp.), 2001 non-responsive (Non-resp.), and 2001 genes whose expression doesn't change (no  $\Delta$ ). \*p-value = 9.37e-54, \*\*p-value = 2.60e-85, \*\*\*p-value = 2.27e-97, \*\*\*\*p-value = 1.34e-296. Responsive genes are defined as those having > log<sub>2</sub> fold-change in gene expression.

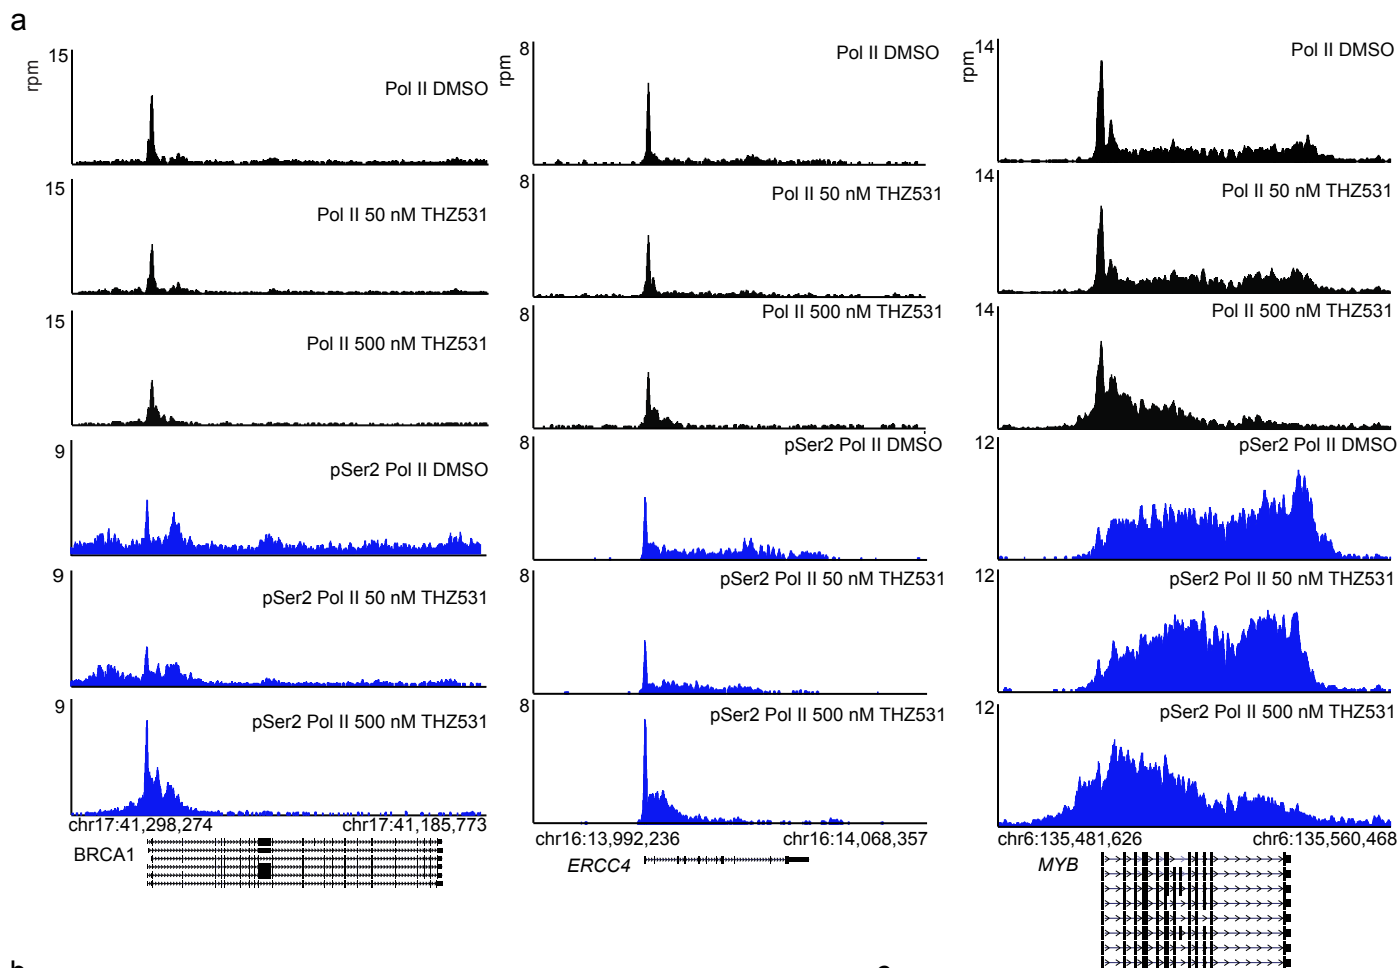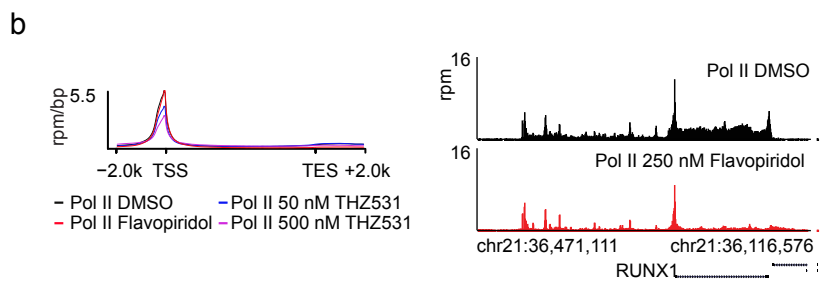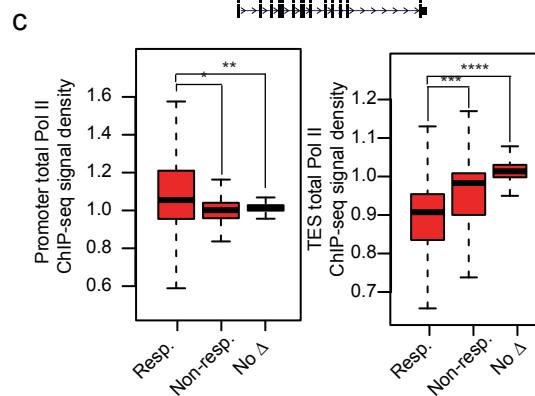

**Supplementary Figure 8 | THZ531 downregulates DDR and transcription factor gene expression**

**a**, The top 2% of genes downregulated with 50 nM show enrichment for genes encoding factors that regulate DDR. David gene ontology analysis, p-values supplied by David program. **b**, RT-qPCR of additional DDR genes transcript expression following THZ531 treatment. \*p-value=2.48e-05, \*\*p-value=1.93e-03, \*\*\*p-value=2.05e-04, \*\*\*\*p-value=6.71e-10, \*\*\*\*\*p-value=6.13e-06, \*\*\*\*\*p-value=1.04e-06. **c**, The top 2% of genes downregulated with 200 nM show enrichment for genes encoding factors that regulate transcription. David gene ontology analysis, p-values supplied by David program. **d**, RT-qPCR of additional T-ALL transcription factor gene transcripts following THZ531 treatment. +p-value=1.29e-07, ++p-value=1.11e-09, +++p-value=6.04e-07. **e**, Super –enhancers and promoters of their associated genes contain more CDK7 ChIP-seq signal compared to typical enhancers and their associated gene promoters. Boxplots demonstrating CDK7 ChIP-seq enhancer (left) and promoter (right) signal at all enhancers (AE), typical enhancers (TE), the top 818 TEs (Top TEs), and the 818 super –enhancers (SE). ^p-value = 4.68e-51, ^^p-value = 4.58e-142. **f**, Super–enhancer –associated gene expression is more sensitive to THZ531. Boxplots showing the fold-change in gene expression for those genes associated with AEs, TEs, and SEs. +p-value = 3.78e-06, ++p-value = 8.90e-06, +++p-value = 3.16e-06, ++++p-value = 1.79e-06, calculated with the two-tailed Student's t test. All RT-qPCR experiments were performed in biological triplicate and error bars are +/- SD. GAPDH gene expression was used as internal control for all RT-qPCR experiments. P-values were determined with a two-tailed Student's T test.



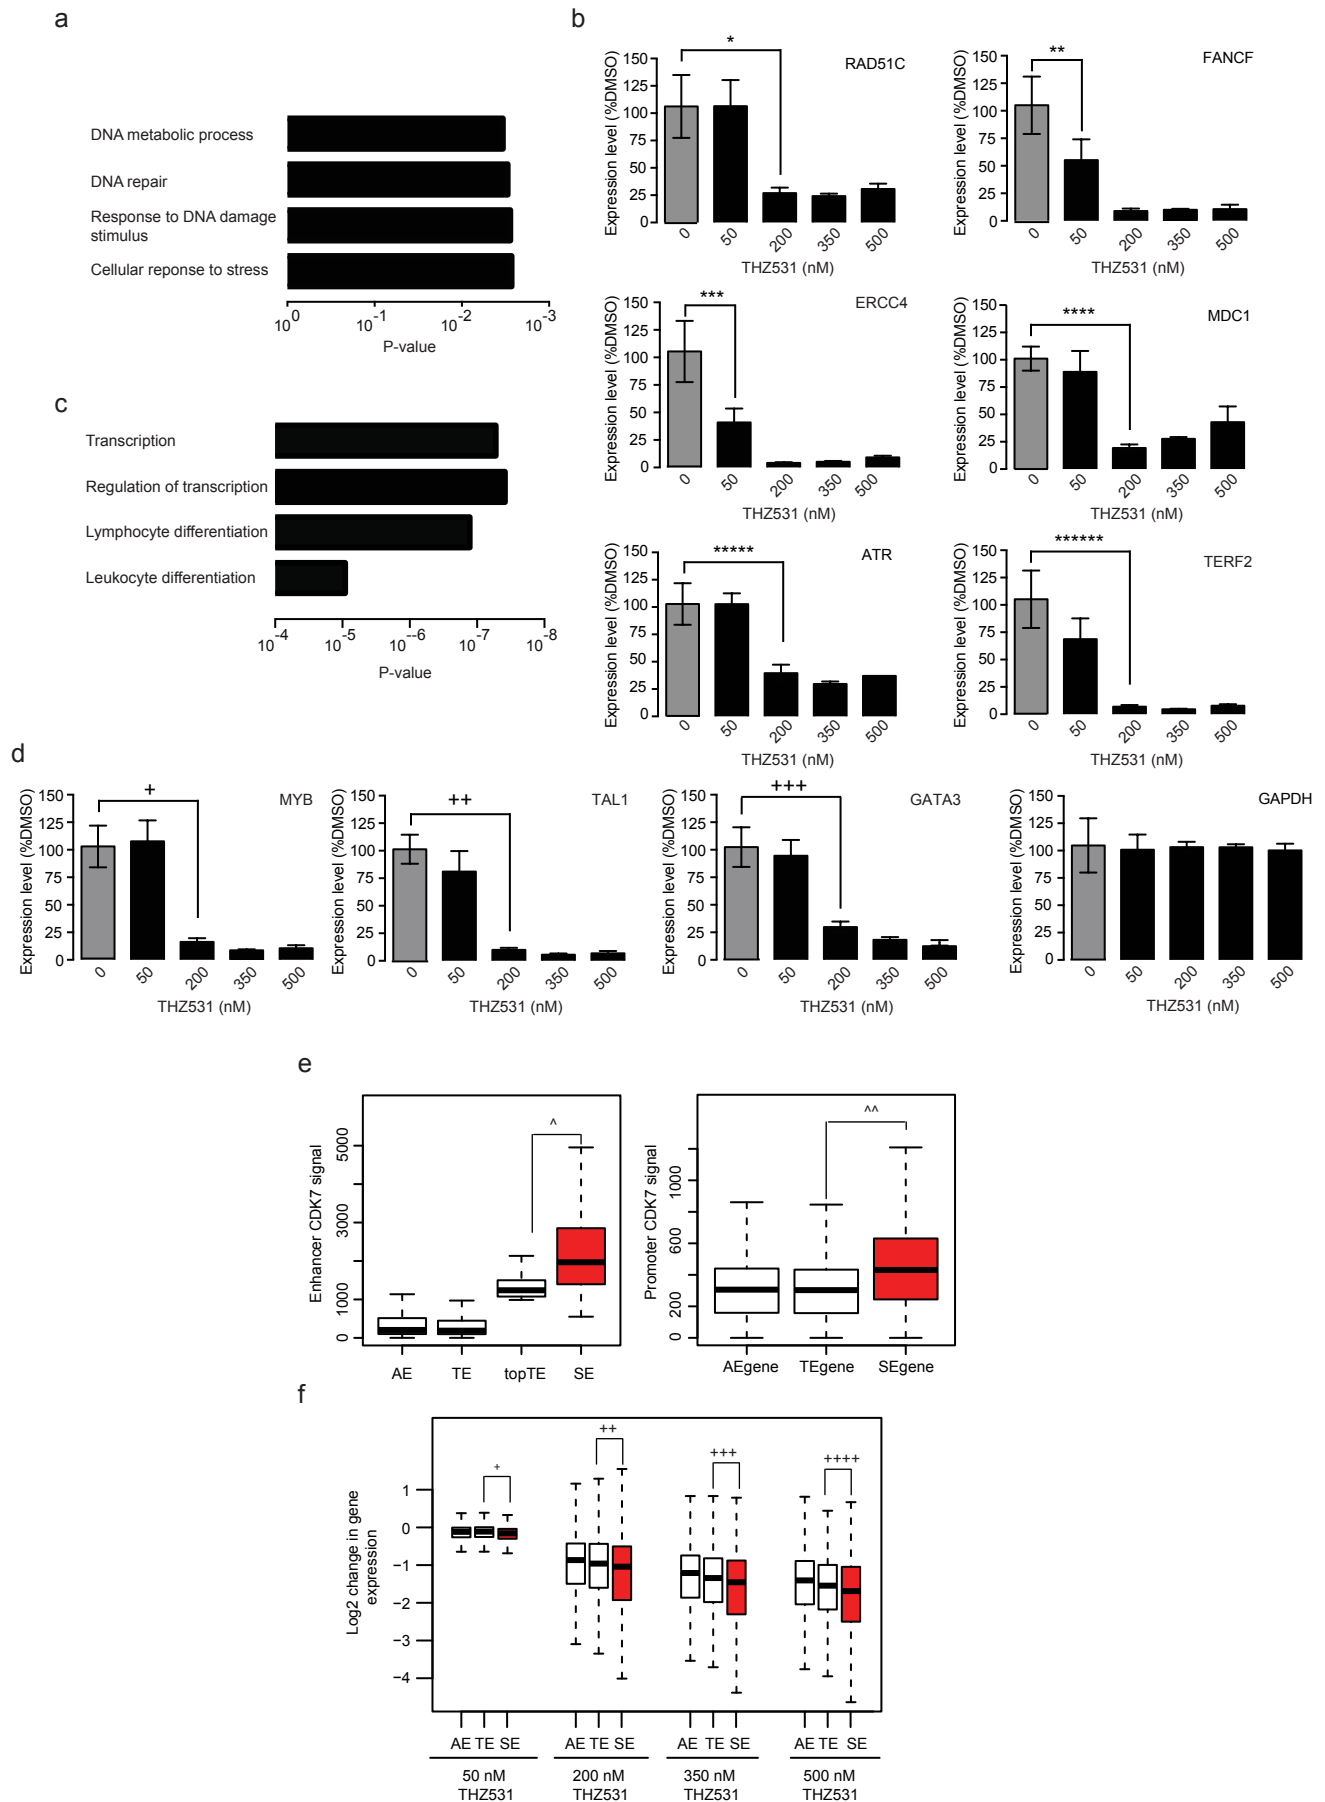

**Supplementary Figure 9 | Super-enhancers contain exceptional amounts of CDK12.**

**a**, Super-enhancer genes contain large amounts of CDK7 (yellow), CDK12 signal (blue), and H3K27Ac (red). Pol II (black) elongation is impacted following treatment with both 250 nM THZ1 and 500 nM THZ531. The red bar indicates the genomic coordinates of a super –enhancer. **b**, SEs (top) and their associated gene promoters (bottom) contain more CDK12 and Pol II ChIP-seq signal compared to TEs and their associated gene promoters. Boxplots demonstrating the ChIP-seq signal for CDK12 (top left) and Pol II (top right) at AEs, TEs, 818 Top TEs , and 818 SEs. Boxplots demonstrating the ChIP-seq signal for CDK12 (bottom left) and Pol II (bottom right) at gene promoters associated with AEs, TEs, and SE. \*p-value = 2.63e-124, \*\*p-value = 3.16e-46, \*\*\*p-value = 4.58e-12, \*\*\*\*p-value = 9.39e-18. **f**, Transcripts down-regulated by 200 nM THZ531 are enriched for transcripts whose associated enhancers contain the highest levels of CDK12 ChIP-seq signal. Gene set enrichment analysis of top 500 transcripts downregulated following a 6-hour treatment with THZ531 (200 nM) in comparison to CDK12 ChIP-seq signal at enhancers for these transcripts GSEA-supplied p-value < 0.001.

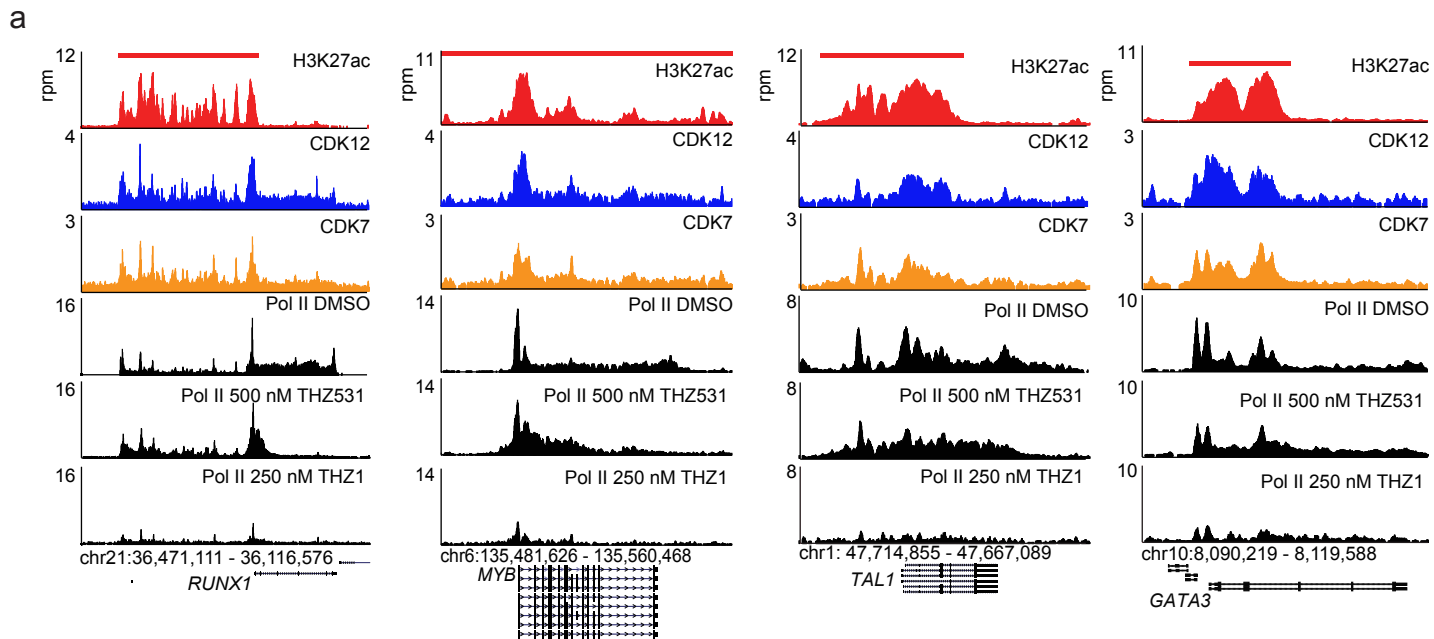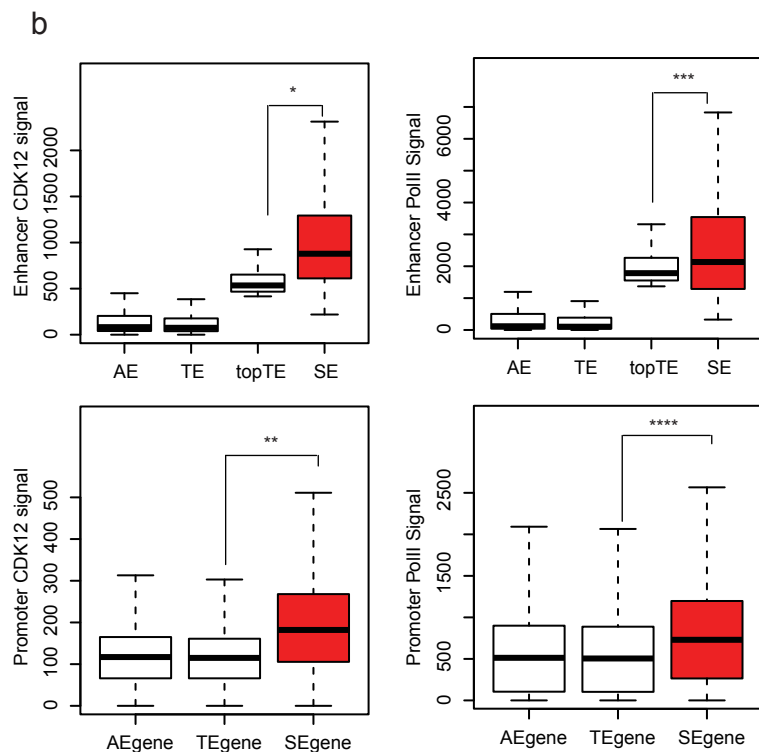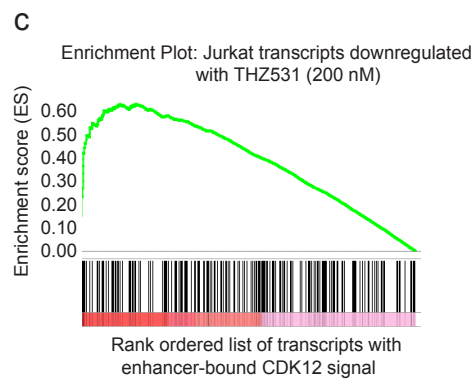

**Supplementary Figure 10 | Uncut western blots**

Uncut western blots corresponding to cropped western blots in main and supplementary figures.

Fig. 1c

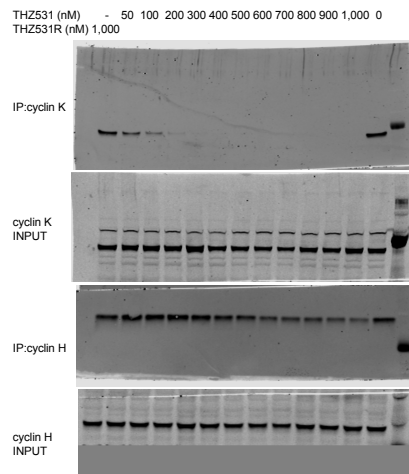

Fig. 1d

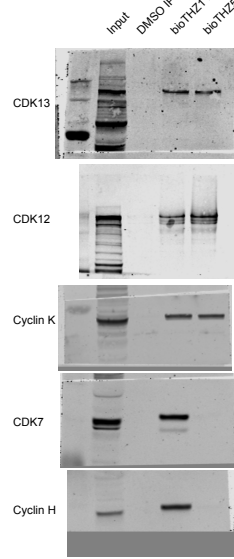

Fig. 3f

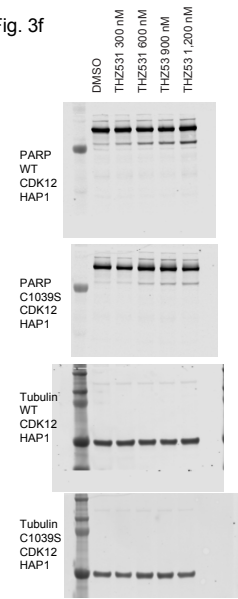

Fig. 5a

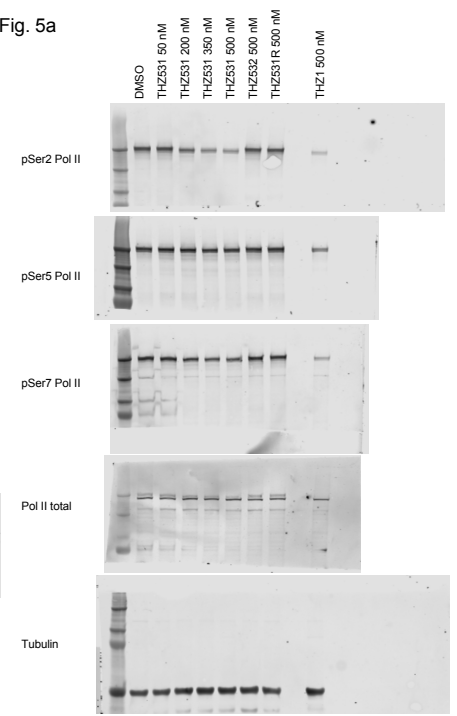

Fig. 5e

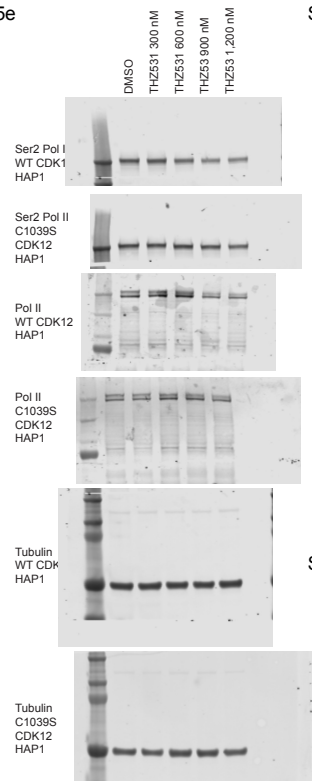

Supp. Fig 1b

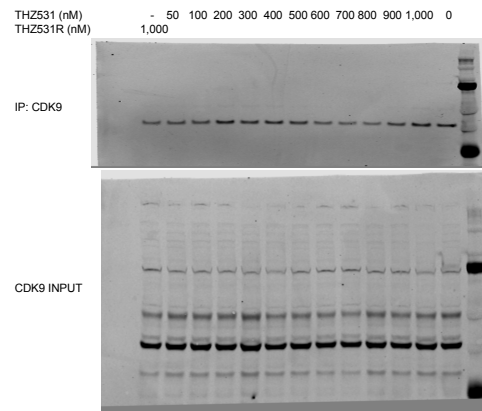

Supp. Fig 5c

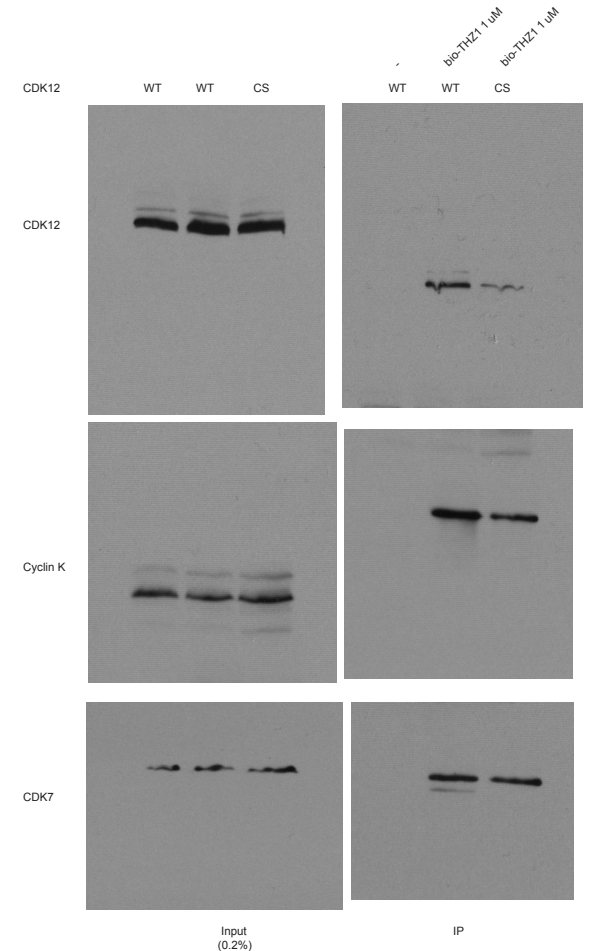

Supp. Fig 4b

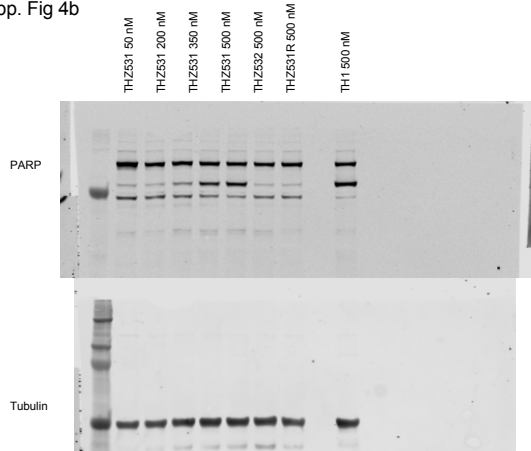

**Supplementary Figure 11 | CDK12 genomic sequence for genome editing**

Modified CDK12 genomic sequence used as repair template in genomic editing experiments.

The modified CDK12 genomic sequence (RefSeq Accession NM\_016507) was cloned into pUC57-AMP by Genewiz and used as the repair template for genome editing:

GCCATGAGGA**GTCCGAC**ATTACACTAGAATGTTGATACATTGAATATGACTTGAAACATATAAGGGTTTTA  
CTGAAATTTGGGAATCCTATTATAGAGAGATTTATAGTAAGATTGACCTACTTGGTCTGATTGTATGA  
GAGATTCTGGACTAAGTTATACGTAGTGCTGAACTCCACAGATGAGCAAGTTGATATCCAGTCATAGAA  
ATTCTGTGGGCAGAAAGGGGAAAGAACTAGTCTTTGGTCCTCACAACCAAATTACACATAAGTTGATTT  
TGCACAGAGATGTTTTGATCATGATACATGGTTCCATGGTTTAAAGTCACCGCCTTTCTCGACCTTCTGT  
ATACATTAACAAGCCAGCCATTACTGTCCTCGTCTTTATTCCCTACTGAAA  
CTTGACCAATACTGTTCTCCTTTTTTGTGTTATGCCAAGGAAAGACAGTATTTATATGGGAATTTATATA  
GCTGGTCTGTACCTAGTATTAGCAAGATCCTCCTTTCTCACTATGTAACCTTTCGACTTTTTATTCCCTCAG  
ACTACCCTGCCATGATTTATTTTACACTGCTGTTACCTACTTTTACTAACTTTTTTGGTTATTTTTGTTT  
TCCTTATTCTTTACATTTCCACAGTCTTTGCCTTCCCAATTTAATCCTTTGCTCCTCCATTCACTACTG  
CTGCATTCCCTTACATATTTCCCTTTGCTTTGTCTTTTTCCAGCCTCCCCACTGGCA**AGAGCTCCAC**  
**AGCT**TGGAGTAAGAAAC**GC**CGACGTCAGCGACAAAGTGGTGTGTAGTCGAAGAGCCACCTCCATCC  
AAAACCTTCTCGAAAAGAAACTACCTCAGGGACAAGTACTGAGCCTGTGAAGAACAGCAGCCAGCACC  
ACCTCAGCCTGCTCCTGGCAAGGTGGAGTCTGGGGCTGGGGATGCAATAGGTCAGTGCCAGAATGGG  
GCCTTTGTGCTTTTGCTAAGCGTATTTGGCAGGTTTTGAAGGTCAAGTGTAAGGAGTTTGTGTGTGTGT  
CTGTTTTTGTAGTTTTGGTCCAGTGAACCATTAGGAAAGAGGTTAATGTCCTCATTATGGTGAGAAGGAG  
ATTAACCAAGTTTCGTACATATGGTCCAGAAAGTCTACAATAGATCATTTCCTTTCCGAAATATGTACG  
GAACACTGTATCTCAATTAGATGTGTGGCATAAATCAGTGAATTAGGTAAGCCAAATTTAATTTAAGGTT  
AGTTCACCCATGACTTTATGAAACACATAATTTGGAGCCTTGTATATTAGATTTGATAAGACCTTCATA  
GAATCTAGTAGTGTAAATTACAATTGCTAAATGTTGTTCTATAGACTGTTATTTTGTCTAAATGTATCTG  
AAACTATGTCATATTGAAGTGTATAACAAAGTAGTTCTCCTGTGTTATGACCAATTCCTTCGGGACAAA  
GATACTCTTTTTCTGGTTCACTTTCCCTCTTC**GAATTC**TGCAGTACCG

1. Green highlighting indicates the introduced desired TCC mutation, which codes for serine (C1039S), replacing TGC which codes for cysteine (C1039, WT)
2. Yellow highlighting indicates wobble mutations introduced to remove Cas9 –targeting cysteines, to prevent cutting of repair template.
3. Pink highlighting indicates Wobble mutations introduced for PCR-based screening to permit WT vs. mutated allele discrimination.
4. Red highlighting indicates Sal I and EcoRI sites used for pUC57 cloning

Sanger sequence of confirmed mutant C1039S allele:

TGATCCGCCTGCCTCTACCTCCCAAAGTGCTGGGATTACAGGCATGAGCTGCCGCGCCAGCCAAATT  
CATTTATTACACTAGAATGTTGATACATTGAATATGACTTGAAACATATAAGGGTTTTACTGAAATTTGGG  
AACTCCTATTATAGAGAGATTTATAGTAAGATTTGACCTACTTGGTCTGATTGTATGAGAGATTCTGGAC  
TAAGTTATACGTAGTGCTGAACTCCACAGATGAGCAAGTTGATATCCAGTCATAGAAATCTGTGGGCA  
GAAAGGGGAAAGAAGTACTGCTTTTGGTCCTCACAACCAAATTACACATAAGTTGATTTGACAGAGAT  
GTTTTGATCATGATACATGGTTCCATGGTTTAAAGTCACCGCCTTTCTCGACCTTCTGTATACATTAACA  
AGCCAGCCATTACTGTCCTCGTCTTTATTCCCTACTGAACTTGACCAATACTGTTCTCCTTTTTTGTGT  
TATGCCAAGGAAAGACAGTATTTATATGGGAATTTATATAGCTGGTCTGTACCTAGTATTAGCAAGATCC  
TCCTTTCTCACTATGTAACCTTTCGACTTTTTATTTCCTCAGACTACCATCTGCCATGATTTATTTTACACTG  
CTGTTACCTACTTTTACTAACTTTTTTGGTTATTTTTGTTTTCTTATTCTTTACATTTCCACAGTCTTTGC  
CTTCCCATTTTAACTTTTGGTCTCCTCCATTCACTGCTGCATTCCCTTACATATTTCCCTTTGCTTT  
GTCTTTTTCCAGCTCCCCACTGGCAAGACTCCACGAGCTCTGGAGTAAGAAACGCGACGTCAGC  
GACAAAGTGGTGTGTAGTCGAAGAGCCACCTCCATCCAAACTTCTCGAAAAGAAAC

## Supplementary Tables

**Supplementary Table 1:** Intracellular KiNATiv™ profiling assay identifies CDK12 and CDK13 as major intracellular targets of THZ531.





|                  |                                                       |                                   |                       |      |      |
|------------------|-------------------------------------------------------|-----------------------------------|-----------------------|------|------|
| MAP2K2           | UniRef100_P36507                                      | HQMHRDVPNSILVNSR                  | Lys2                  | 6.4  | 26.4 |
| MSK2 domain1     | UniRef100_075776                                      | DKLRLLELGGSEHVVTDGSLK             | Lys2                  | 6.5  | 1.4  |
| NEK1             | UniRef100_096P16                                      | DKSQNFIK                          | Lys2                  | 6.5  | 0.4  |
| ZAK              | UniRef100_Q9N1L2                                      | WSDQKEVAVK                        | Lys1                  | 6.5  | 7.3  |
| SRAF             | UniRef100_P15556                                      | DKSQNFIHEDVTVK                    | Lys2                  | 6.7  | 6.4  |
| AMPKa1, AMPKa2   | UniRef100_P54646, UniRef100_Q9E9Z                     | VAVKLNK                           | Lys1                  | 7.1  | 0.1  |
| FER              | UniRef100_P16591                                      | TSVAIVTKCDKDPQLK                  | Lys1                  | 7.2  | 5.6  |
| PKCZ             | UniRef100_Q00329                                      | VWLVLVNKKDQHRK                    | Lys2                  | 7.9  | 1.6  |
| Wnk1, Wnk2       | UniRef100_Q9Y351, UniRef100_D10DUP1                   | GSFTVYK                           | ATP Loop              | 8.2  | 18.2 |
| SMG1             | UniRef100_Q9GQ15                                      | SYPFIRKGGIDLDLDR                  | ATP                   | 9.1  | 0.1  |
| HSPK1            | UniRef100_Q9Q18                                       | DROGSLVLAIVK                      | Lys1                  | 9.1  | 1.1  |
| ATR              | UniRef100_Q13535                                      | FYIMACDFK                         | ATP                   | 9.2  | 8.7  |
| POK1             | UniRef100_Q15530                                      | EYAKLIK                           | Lys1                  | 9.4  | 7.7  |
| STK6             | UniRef100_Q9C9K7                                      | SHASHLREGDYLVSGLSHLSVK            | Lys2                  | 9.7  | 1.9  |
| SRPK1            | UniRef100_Q9G584                                      | IRHTDQFNILLSVNEGYR                | Lys2                  | 9.8  | 5.5  |
| IKK4             | UniRef100_P16587                                      | AGDQEDQSPHSHGDKSSNVLDR            | Lys2                  | 10.3 | 10.7 |
| MKK3             | UniRef100_Q15584                                      | GLSVAVKAR                         | Lys1                  | 11.1 | 1.1  |
| NEK7             | UniRef100_Q8T0X7                                      | AACLLDGVPAVKK                     | Lys1                  | 11.1 | 13.7 |
| PKCa, PKCb       | UniRef100_P05771, UniRef100_P17252                    | DALKLVNLSDDSHK                    | Lys2                  | 11.1 | 20.1 |
| CaMK4            | UniRef100_Q16566                                      | DLKFNLYVTRAPDAFLK                 | Lys2                  | 11.4 | 14.9 |
| RSK1 domain1     | UniRef100_Q15418                                      | LTFQGLSEADHEKK                    | Activation Loop       | 11.5 | 5.2  |
| PKD              | UniRef100_Q94806                                      | DVAIVKDK                          | Lys1                  | 11.6 | 2.8  |
| AMPKa1           | UniRef100_Q9G49Z                                      | VGHHLTGKVAIVKLNK                  | Lys1                  | 11.8 | 0.5  |
| CDK2             | UniRef100_P24941                                      | DUKPDLNTEGAIK                     | Lys2                  | 11.8 | 2.1  |
| ABL, ARG         | UniRef100_P00519, UniRef100_P42684                    | LMFTGTYTHAGASGPK                  | Activation Loop       | 12.1 | 12.2 |
| GFRK5            | UniRef100_P41250                                      | DLKFNLLDQGHHR                     | Lys2                  | 12.1 | 28.3 |
| NDK1             | UniRef100_Q15208                                      | DTGHVYAMKLR                       | Lys1                  | 12.1 | 13.8 |
| NEK9             | UniRef100_Q8T019                                      | RTDQSLVWKKVDLTK                   | Lys1                  | 12.1 | 6.5  |
| PHF42C           | UniRef100_Q8T8X8                                      | VKLPLTKDMDLNLK                    | ATP                   | 12.1 | 9.8  |
| MTF3             | UniRef100_Q9Y460                                      | VVAIKDDEIAIDEDDQDITVLSQCCDPPYTK   | Lys1                  | 12.3 | 21.7 |
| PKD1, PKD2       | UniRef100_Q9G264, UniRef100_Q15139                    | NIKQKSLKPLVLAASGPPQVK             | Lys2                  | 12.3 | 1.9  |
| CK2a1            | UniRef100_P68400                                      | GGNINLADVQDVPYR                   | Protein Kinase Domain | 12.3 | 5.3  |
| IKK              | UniRef100_Q13418                                      | WQGNQDWWVVK                       | Lys1                  | 12.3 | 6.6  |
| Phk2             | UniRef100_P15735                                      | ATGHEFAVMEVYTER                   | Lys1                  | 12.5 | 0.9  |
| MARK4            | UniRef100_Q9S134                                      | EVAIKDQTLNPPSSLQK                 | Lys1                  | 12.6 | 5.9  |
| PKD              | UniRef100_P41143                                      | TKAMKVK                           | Lys1                  | 12.6 | 22.0 |
| CKK2             | UniRef100_Q96017                                      | VAKIKK                            | Lys1                  | 12.9 | 1.6  |
| PCATRE1          | UniRef100_Q00536                                      | SKLTLNVALEKIK                     | Lys1                  | 13.9 | 0.6  |
| PKAa, PWAAP7     | UniRef100_P14912, UniRef100_P42356                    | SGTFNAGASGFLPK                    | ATP                   | 14.1 | 8.8  |
| MAP2K1           | UniRef100_Q02750                                      | IMHRDVPNSILVNSR                   | Lys2                  | 14.5 | 19.3 |
| p70S6kb          | UniRef100_Q9J850                                      | DLKFNLLDQGHHR                     | Lys2                  | 14.6 | 7.1  |
| SRF              | UniRef100_P42145                                      | IGSARLQNTKQPR                     | ATP                   | 14.7 | 12.1 |
| ZAP70            | UniRef100_P43403                                      | QDVAIVLK                          | Lys1                  | 14.9 | 1.1  |
| MPK1             | UniRef100_Q75716                                      | LGGGGSPYVLLVGHGQHFYALKR           | Lys1                  | 15.1 | 12.5 |
| FAK              | UniRef100_Q05397                                      | CSGGGQHGQWGDYKSPFWLAVAVKTK        | Lys1                  | 15.1 | 8.8  |
| PRP4             | UniRef100_Q13523                                      | CMLHADKPNILNVEK                   | Lys2                  | 15.8 | 2.4  |
| CamKK2           | UniRef100_Q9G984                                      | DWPSMLVDEGDK                      | Lys2                  | 16.1 | 8.1  |
| AKT1             | UniRef100_P13149                                      | GTQGLVLYK                         | ATP Loop              | 16.1 | 1.9  |
| MAPKAPK3         | UniRef100_Q16644                                      | IGDLGVNGVLECFHR                   | ATP Loop              | 16.2 | 4.8  |
| DGK4             | UniRef100_P23743                                      | IQVYRTHPLVLLVPPVSGGK              | ATP                   | 16.4 | 10.3 |
| NDK2             | UniRef100_Q9Y2H1                                      | DTGHVAMKLR                        | Lys1                  | 16.4 | 9.4  |
| KHS1             | UniRef100_Q9Y464                                      | NVHTLEAAVKKK                      | Lys1                  | 17.2 | 4.3  |
| LOK              | UniRef100_Q94804                                      | NIKTLAALAAVYKTK                   | Lys1                  | 17.2 | 11.2 |
| RAF1             | UniRef100_P04049                                      | DKMKNLREGYTK                      | Lys2                  | 18.2 | 11.8 |
| CDK2             | UniRef100_Q9S494                                      | DLKFNLLDQGHHR                     | Lys2                  | 18.4 | 5.9  |
| DNAPK            | UniRef100_P19827                                      | EMFPEPQEDAK                       | ATP                   | 18.4 | 14.2 |
| SMG1             | UniRef100_Q9GQ15                                      | DTYVSGVGETITLPTTKPK               | ATP                   | 18.6 | 4.8  |
| ULK3             | UniRef100_D10W67                                      | NSHLDPKDNILLSLKPALK               | Lys2                  | 18.7 | 10.8 |
| YSK1             | UniRef100_Q00556                                      | EVVAHQDLSEAEDEHGGQITVLSQCCDPPYTK  | Lys1                  | 18.9 | 12.1 |
| AurB             | UniRef100_Q9G604                                      | SFVAVLVKFK                        | Lys1                  | 19.7 | 16.7 |
| PHF42C           | UniRef100_Q8T8X8                                      | TLVKEVYSIDADHMLNLSHVHYVK          | ATP                   | 20.2 | 14.7 |
| CK2a2            | UniRef100_P78568                                      | DWPSMLVDEGDK                      | Lys2                  | 20.3 | 0.9  |
| Wnk1, Wnk2, Wnk4 | UniRef100_Q9G49Z, UniRef100_Q9Y351, UniRef100_D10DUP1 | IGDGLATLKR                        | Activation Loop       | 21.3 | 16.1 |
| MARK2            | UniRef100_Q7K217                                      | FWHRQKALNLLDADMNK                 | Lys2                  | 21.6 | 3.8  |
| Wnk1, Wnk2, Wnk3 | UniRef100_Q9Y351, UniRef100_D10DUP1, UniRef100_Q9Y977 | DLKFNLLDQGHHR                     | Lys2                  | 22.8 | 6.2  |
| ABL, ARG         | UniRef100_P00519, UniRef100_P42684                    | YSLTVAVTKLKTEDTMEVEFLK            | Lys1                  | 22.9 | 6.1  |
| QSK              | UniRef100_Q9Y242                                      | VAKIKDQLDDENLK                    | Lys1                  | 22.9 | 1.4  |
| PHF42B           | UniRef100_P78556                                      | AKDLPTKQDNLNEGQK                  | ATP                   | 23.1 | 2.4  |
| MLK1             | UniRef100_Q8N816                                      | APVAIVKFK                         | Lys1                  | 23.3 | 6.2  |
| BAR1             | UniRef100_P25098                                      | DLKFNLLDQGHHR                     | Lys2                  | 23.6 | 8.1  |
| TYK2 domain2     | UniRef100_P25097                                      | IGSGLVLAPEGSEHYR                  | Activation Loop       | 23.6 | 37.4 |
| IKKε             | UniRef100_Q14164                                      | SSELVAIVFNNTSYLPRR                | Lys1                  | 24.1 | 14.4 |
| PHF42G           | UniRef100_P48736                                      | KRFVLEPK                          | ATP                   | 24.1 | 7.9  |
| TBK1             | UniRef100_Q949C2                                      | TGSLVAIVFNKSLRPVQDMR              | Lys1                  | 24.5 | 15.1 |
| CamKK2d          | UniRef100_Q13557                                      | IFTGQYAAKINTK                     | Lys1                  | 24.9 | 6.5  |
| PKCδ             | UniRef100_Q8N499                                      | TGGLGVYRFRKQDRLDQLQLSMDK          | ATP                   | 24.9 | 2.6  |
| STK6             | UniRef100_Q9C9K7                                      | HTFTGLVTRNLENCNER                 | Lys1                  | 26.3 | 9.5  |
| ARAF             | UniRef100_P10398                                      | DUKSNRFLHGLVTK                    | Lys2                  | 26.4 | 0.9  |
| ZCL1/IKK         | UniRef100_Q9S439                                      | TGGLVAVNVDVTEKTEEEELKELMLAK       | Lys1                  | 26.7 | 9.3  |
| ACK              | UniRef100_Q07912                                      | TVSVAVLEKPLVLSQFAAMDFFIR          | Lys1                  | 26.8 | 21.5 |
| RSK1 domain1     | UniRef100_Q15418                                      | KYTRPQSHVYAMKVLK                  | Lys1                  | 27.1 | 1.6  |
| PKCζ             | UniRef100_Q8N499                                      | TEGGVYVFRKGGDLR                   | ATP                   | 27.9 | 2.1  |
| PHF42A           | UniRef100_P48426                                      | CALKLYDPK                         | Lys1                  | 28.8 | 0.9  |
| PKR              | UniRef100_P19525                                      | AKELPLTKDNDFNEGQK                 | ATP                   | 29.3 | 7.5  |
| STLKS            | UniRef100_Q16566                                      | IGSGLVLYLNSGSR                    | Activation Loop       | 29.8 | 6.9  |
| CaMK4            | UniRef100_Q7RTN6                                      | SVKASHLVGQK                       | Lys2                  | 30.3 | 3.3  |
| LOK              | UniRef100_P06339                                      | EGSAFVIVTRFAINVTFTIK              | Activation Loop       | 30.9 | 11.8 |
| CDK2             | UniRef100_P24941                                      | LTEGVALKK                         | Lys1                  | 31.1 | 1.1  |
| IRE1             | UniRef100_Q17460                                      | DLKFNLLDQGHHR                     | Lys2                  | 31.1 | 19.7 |
| ITPK1            | UniRef100_Q15172                                      | ESRFNSHNSQFSSSLTELDKIEGVFRSPDVEIR | ATP                   | 34.6 | 5.7  |
| PKCa             | UniRef100_P17252                                      | KGTEELVAVLK                       | Lys1                  | 34.6 | 16.2 |
| PKD              | UniRef100_P06441                                      | VAKIKDQLDDENLK                    | Lys1                  | 35.7 | 1.1  |
| PHF42B           | UniRef100_Q00750                                      | VFKCCDQDRQDMLQDMR                 | ATP                   | 36.1 | 28.3 |
| FYN, SRC, YES    | UniRef100_P12931, UniRef100_P07947, UniRef100_P06241  | QGLAFPRVWTPAALAYGR                | Activation Loop       | 42.1 | 10.8 |
| ZC2/7NIK         | UniRef100_Q9H4E5                                      | TGGLVAVNVDVTEKTEEEELKELMLAK       | Lys1                  | 42.3 | 13.9 |
| PKCα             | UniRef100_P24723                                      | VKLTGVAVVVKK                      | Lys1                  | 43.7 | 13.2 |
| CaMK4            | UniRef100_Q16566                                      | IVHQLVMKTYCGTPQYCAPFLR            | Activation Loop       | 44.1 | 14.8 |
| PKCδ             | UniRef100_P42136                                      | RFWVAVNVDVTEKTEEEELKELMLAK        | ATP                   | 52.3 | 48.4 |
| PHK3B            | UniRef100_P42138                                      | VFEGAGVYRFGDGLDQDMLQLR            | ATP                   | 57.9 | 5.5  |
| PAK2             | UniRef100_Q13177                                      | IGQAGSIVTFATDVALGQEVAKINLQK       | Lys1                  | 61.1 | 6.1  |

**Supplementary Table 2:** Table of diffraction data collection and refinement statistics for CDK12-cyclin K and THZ531 co-crystal structure.

**Table 2** Data collection and refinement statistics (molecular replacement)

| CDK12 <sup>715-1052</sup> /cyclin K <sup>11-267</sup> |                         |
|-------------------------------------------------------|-------------------------|
| <b>Data collection</b>                                |                         |
| Space group                                           | <i>P</i> 2 <sub>1</sub> |
| Cell dimensions                                       |                         |
| <i>a</i> , <i>b</i> , <i>c</i> (Å)                    | 49.8, 148.7, 91.6       |
| $\alpha$ , $\beta$ , $\gamma$ (°)                     | 90.0, 93.8, 90.0        |
| Resolution (Å)                                        | 41.3-2.7(12.1-2.7)*     |
| <i>R</i> <sub>merge</sub>                             | 0.071 (0.569)           |
| <i>I</i> / $\sigma$ <i>I</i>                          | 12.5 (1.9)              |
| Completeness (%)                                      | 98.7 (99.0)             |
| Redundancy                                            | 3.0 (3.1)               |
| <b>Refinement</b>                                     |                         |
| Resolution (Å)                                        | 41.3-2.7                |
| No. reflections                                       | 34,240 (2581)           |
| <i>R</i> <sub>work</sub> / <i>R</i> <sub>free</sub>   | 22.1/26.2               |
| No. atoms                                             |                         |
| Protein                                               | 8993                    |
| Ligand/ion                                            | 80                      |
| <i>B</i> -factors                                     |                         |
| Protein                                               | 61.1                    |
| Ligand/ion                                            | 87.0                    |
| R.m.s. deviations                                     |                         |
| Bond lengths (Å)                                      | 0.0072                  |
| Bond angles (°)                                       | 1.1369                  |

\*Single crystal.

Values in parentheses are for highest-resolution shell.

**Supplementary Table 3:** GEO upload files

| <b>ChIP-seq samples</b>                                         | <b>Figure</b>                                    | <b>GEO</b>                                                                                  |
|-----------------------------------------------------------------|--------------------------------------------------|---------------------------------------------------------------------------------------------|
| Jurkat DMSO Pol II                                              | 4a,b,c,d; 5f,h; 6f; SF5; SF7a,b,c;<br>SF9a,b     | GSM1850204 (NEW)                                                                            |
| Jurkat H3K27ac                                                  | 4a,b,c,d; 6e,f; SF8e,f; SF9a,b                   | GSM1296384                                                                                  |
| Jurkat CDK7                                                     | SF8e; SF9a                                       | GSM1296385                                                                                  |
| Jurkat CDK12                                                    | 4a,b,c,d; 6f,g; SF9a,b,c                         | GSM1850203 (NEW)                                                                            |
| Jurkat 50nM THZ531 Pol II                                       | 5f,h; 6f; SF7a,b                                 | GSM1850205 (NEW)                                                                            |
| Jurkat 500nM THZ531 Pol II                                      | 5f,h; 6f; SF7a,b; SF9a                           | GSM1850206 (NEW)                                                                            |
| Jurkat Input DNA                                                |                                                  | GSM1296386                                                                                  |
| Jurkat Flavo Pol II                                             | SF7b,c                                           | GSM1224787                                                                                  |
| Jurkat THZ1 Pol II                                              | SF9a                                             | GSM1224785                                                                                  |
| Jurkat DMSO pSer2 Pol II                                        | 5b,f,g; SF7a                                     | GSE72023                                                                                    |
| Jurkat 50 nM THZ531 pSer2 Pol II                                | 5b,f,g; SF7a                                     | GSE72023                                                                                    |
| Jurkat 500 nM THZ531 pSer2 Pol II                               | 5b,f,g; SF7a                                     | GSE72023                                                                                    |
|                                                                 |                                                  |                                                                                             |
| Expression microarrays                                          | 5c,d,g,h; 6a,c,g; SF6b,c; SF7c;<br>S8a,c,f; SF9c | GSE72022                                                                                    |
| Previous THZ1 data from THZ1 paper<br>(both 50 and 250 nM data) | SF6c                                             | GSM1224822, GSM1224826,<br>GSM1224827, GSM1224818,<br>GSM1224819, GSM1224820,<br>GSM1224821 |
| Previous Flavopiridol data from THZ1<br>paper (250 nM data)     | SF7c                                             | GSM1224823, GSM1224822                                                                      |

## Supplementary Data Sets

**Supplementary Data Set 1:** Mass spectrometry identifies CDK12-cyclin K and CDK13-cyclin K complexes as major targets of bioTHZ531 in Jurkat cell lysates.

See accompanying excel file

**Supplementary Data Set 2:** *In vitro* Ambit™ binding assay shows THZ531 potently inhibits CDK13.

See accompanying excel file

**Supplementary Data Set 3:** Gene expression microarray data of THZ531, Flavopiridol, THZ1 – treated cells.

See accompanying excel file

**Supplementary Data Set 4:** Jurkat enhancers and super –enhancers identified by H3K27Ac ChIP-seq.

See accompanying excel file
